# Supplementary material for: Canadian Collaboration to Identify a Minimum Dataset for Antimicrobial Use Surveillance for Policy and Intervention Development across Food Animal Sectors
Source: MDPI journal article supplement (doi:10.3390/antibiotics11020226), 2022-02-10
Supplement: s1 [file s1]

## Supplementary Materials

**Table S1.** Affiliations of the working group involved in the development of the minimum dataset for antimicrobial use surveillance (MDS-AMU-surv) between 2016 and 2017

| Organization                                                                       | Type                                     |
|------------------------------------------------------------------------------------|------------------------------------------|
| Agriculture and Agri-food Canada                                                   | Federal government                       |
| Animal Nutrition Association of Canada                                             | Industry                                 |
| Canadian Animal Health Institute                                                   | Industry                                 |
| Canadian Aquaculture Industry Alliance                                             | Industry                                 |
| Canadian Food Inspection Agency                                                    | Federal government*                      |
| Canadian Hatching Egg Producers                                                    | Industry                                 |
| Canadian Pork Council                                                              | Industry                                 |
| Canadian Poultry and Egg Processors Council and the Canadian Hatcheries Federation | Industry                                 |
| Canadian Sheep Federation                                                          | Industry                                 |
| Canadian Veterinary Medical Association                                            | Professional association                 |
| Chicken Farmers of Canada                                                          | Industry                                 |
| Council of Chief Veterinary Officers (Antimicrobial use task team)                 | Federal-provincial-territorial task team |
| Dairy Farmers of Canada                                                            | Industry                                 |
| Dairy Farmers of Ontario                                                           | Industry                                 |
| Egg Farmers of Canada                                                              | Industry                                 |
| Le Centre de développement du porc du Québec                                       | Industry                                 |
| National Cattle Feeders Association                                                | Industry                                 |
| Ontario Ministry of Agriculture, Food and Rural Affairs                            | Provincial government*                   |
| Public Health Agency of Canada                                                     | Federal government*                      |
| TDV Global                                                                         | Private                                  |
| Turkey Farmers of Canada                                                           | Industry                                 |
| University of Calgary                                                              | Academia                                 |
| Veal Farmers of Ontario                                                            | Industry                                 |
| Veterinary Drugs Directorate – Health Canada                                       | Federal government                       |

\*Lead coordinating agencies/government for the MDS-AMU-surv

**Table S2.** Questionnaire, Inclusion and Feasibility Score

<sup>1</sup> **Inclusion Scores:** 0=Not required; 1=Must be included; 2=Nice to have.

<sup>2</sup> **Feasibility Scores:** 0=Not feasible; 1=Currently being collected by your org.; 2=Could start collecting with minimal effort; 3=Could start collecting with significant effort.

|      |                               |                          |
|------|-------------------------------|--------------------------|
| 1.00 | <b>Respondent Information</b> |                          |
| 1.10 |                               | Name of respondent       |
| 1.20 |                               | Organization represented |

  

|         |                                                                                                                |                                                                                                       |
|---------|----------------------------------------------------------------------------------------------------------------|-------------------------------------------------------------------------------------------------------|
| 2.00    | <b>At what level will these data be collected? Please select only one from the list below by entering "1".</b> |                                                                                                       |
| 2.10    |                                                                                                                | Pharmaceutical manufacturer sales data (e.g. CAHI - legislative change will make reporting mandatory) |
| 2.20    |                                                                                                                | Veterinary prescription data                                                                          |
| 2.30    |                                                                                                                | Veterinary drug sales data                                                                            |
| 2.40    |                                                                                                                | Veterinary records (real time or sample of 48 hour diary data)                                        |
| 2.50    |                                                                                                                | Farm level antimicrobial use data                                                                     |
| 2.60    |                                                                                                                | Other - Levels                                                                                        |
| 2.61    |                                                                                                                | Specify <i>Other</i> :                                                                                |
| Section | <b>OUTPUTS</b>                                                                                                 | <b>DATA REQUIRE TO PROVIDE OUTPUT</b>                                                                 |
| 3.00    | <b>A list of active antimicrobial ingredient (AI) used (Yes/No)</b>                                            |                                                                                                       |
| 3.10    |                                                                                                                | Product ID                                                                                            |
| 3.20    |                                                                                                                | Active Ingredient(s)                                                                                  |
| 4.00    | <b>Counts (frequencies) of AI Use</b>                                                                          |                                                                                                       |
| 4.10    |                                                                                                                | Count of sales by pharmaceutical manufacturers                                                        |
| 4.20    |                                                                                                                | Count of purchases by pharmacies                                                                      |
| 4.30    |                                                                                                                | Count of purchases by veterinary clinics                                                              |
| 4.40    |                                                                                                                | Count of prescriptions                                                                                |
| 4.50    |                                                                                                                | Count of purchases by farms                                                                           |
| 4.60    |                                                                                                                | Count of medicated/non-medicated rations                                                              |
| 4.70    |                                                                                                                | Count of treatments                                                                                   |
| 4.80    |                                                                                                                | Other - Counts                                                                                        |
| 4.81    |                                                                                                                | Specify <i>Other</i> :                                                                                |
| 5.00    | <b>Quantity of AI Use ("per" the denominator selected below)</b>                                               |                                                                                                       |
| 5.10    |                                                                                                                | Mgs distributed (Pharmaceutical Manufacturers)                                                        |
| 5.20    |                                                                                                                | Mgs purchased (Vet./Pharm.)                                                                           |
| 5.30    |                                                                                                                | Mgs used (may require data from Section 5)                                                            |
| 5.40    |                                                                                                                | Mgs sold by pharmaceutical manufacturers                                                              |
| 5.50    |                                                                                                                | Mgs purchased by pharmacies                                                                           |
| 5.60    |                                                                                                                | Mgs purchased by veterinary clinics                                                                   |
| 5.70    |                                                                                                                | Mgs purchased by farms                                                                                |
| 5.80    |                                                                                                                | Mgs prescribed                                                                                        |
| 5.90    |                                                                                                                | Other - Quantities                                                                                    |
| 5.91    |                                                                                                                | Specify <i>Other</i> :                                                                                |
| 6.00    |                                                                                                                | <b>Prescribing/dispensing/use details (Data in Section 6 are required for Quantitative outputs)</b>   |
| 6.10    |                                                                                                                | Production class or phase                                                                             |
| 6.20    |                                                                                                                | Route of administration                                                                               |
| 6.30    |                                                                                                                | Injection - Dose                                                                                      |
| 6.31    |                                                                                                                | Injection - Frequency of administration                                                               |
| 6.32    |                                                                                                                | Injection - Duration of treatment                                                                     |

|       |                                             |                                                                                                                 |
|-------|---------------------------------------------|-----------------------------------------------------------------------------------------------------------------|
| 6.40  |                                             | Feed - Dose (e.g. grams/tonne)                                                                                  |
| 6.41  |                                             | Feed intake (Ration starting weight or age and days fed)                                                        |
| 6.50  |                                             | Water - Dose (e.g., grams/liter)                                                                                |
| 6.51  |                                             | Water - Dose (Concentration of drug per product)                                                                |
| 6.52  |                                             | Water intake (Starting weight or age and days exposed)                                                          |
| 6.60  |                                             | Count (%) of treated animals                                                                                    |
| 6.70  |                                             | Other prescription information                                                                                  |
| 6.71  |                                             | Specify other:                                                                                                  |
| 7.00  | <b>Denominator</b>                          |                                                                                                                 |
| 7.10  |                                             | Number of animals exposed                                                                                       |
| 7.20  |                                             | Number of animals not exposed                                                                                   |
| 7.30  |                                             | Number of animals processed                                                                                     |
| 7.40  |                                             | Time: Average days/weeks/months in each production phase, e.g., Avg. days in grower-finisher phase              |
| 7.50  |                                             | Location: Province/region, sentinel site area...                                                                |
| 7.60  |                                             | Other Denominators                                                                                              |
| 7.61  |                                             | Specify Other:                                                                                                  |
| 9.00  | <b>Reason for use</b>                       |                                                                                                                 |
| 9.10  |                                             | Primary reason (Prevention/Treatment)                                                                           |
| 9.20  |                                             | Secondary reasons (Commodity specific disease categories)                                                       |
| 9.30  |                                             | Target pathogen, e.g., specific bacteria                                                                        |
| 9.40  |                                             | Expert opinion to establish reasons for use of an antimicrobial                                                 |
| 9.50  |                                             | Other Reasons                                                                                                   |
| 9.51  |                                             | Specify Other:                                                                                                  |
| 10.00 | <b>Other data of interest</b>               |                                                                                                                 |
| 10.10 |                                             | Extra-label drug use (ELDU Yes/No)                                                                              |
| 10.20 |                                             | Imported (DIN/Non-DIN Yes/No)                                                                                   |
| 10.30 |                                             | Compounded (Yes/No)                                                                                             |
| 10.40 |                                             | Emergency drug release (EDR Yes/No)                                                                             |
| 10.50 |                                             | Economic indicators - production parameters ( <i>from discussion on Outcomes</i> )                              |
| 10.60 |                                             | Animal health indicators                                                                                        |
| 10.70 |                                             | Other Data of Interest                                                                                          |
| 10.71 |                                             | Specify Other:                                                                                                  |
| 11.00 | <b>Report by</b>                            |                                                                                                                 |
| 11.10 |                                             | Active antimicrobial ingredient                                                                                 |
| 11.11 |                                             | Antimicrobial class                                                                                             |
| 11.20 |                                             | Categories of importance to human medicine (VDD-HC Cat. I, II, III and IV)                                      |
| 11.30 |                                             | Animal species                                                                                                  |
| 11.40 |                                             | Commodity/sector                                                                                                |
| 11.50 |                                             | Farm demographics (e.g., Production type)                                                                       |
| 11.60 |                                             | Veterinarian demographics (e.g. specialization)                                                                 |
| 11.70 |                                             | Temporal trends (Years, months...)                                                                              |
| 11.80 |                                             | Spatial trends (Canadian Provinces/Regions)                                                                     |
| 11.90 |                                             | Other items to report by                                                                                        |
| 11.91 |                                             | Specify <i>Other</i> :                                                                                          |
| 12.00 | <b>Sample size</b>                          |                                                                                                                 |
| 12.10 |                                             | Census                                                                                                          |
| 12.30 |                                             | A proportion of the population that would provide a valid and representative sample, mindful of cost and effort |
| 12.40 |                                             | Other sample size considerations                                                                                |
| 12.41 |                                             | Specify <i>Other</i> :                                                                                          |
| 13.00 | <b>Who would collect/submit these data?</b> |                                                                                                                 |
| 13.10 |                                             | Commodity organizations                                                                                         |
| 13.20 |                                             | Veterinarians                                                                                                   |
| 13.30 |                                             | Pharmaceutical industry                                                                                         |

|       |                                                                                                      |                        |
|-------|------------------------------------------------------------------------------------------------------|------------------------|
| 13.40 |                                                                                                      | Provincial gov. agency |
| 13.50 |                                                                                                      | Federal gov. agency    |
| 13.60 |                                                                                                      | Other Orgs             |
| 13.61 |                                                                                                      | Specify <i>Other</i> : |
| 14.00 | Short summary: What is your organization doing currently re: AMU data collection and/or future plans |                        |
| 14.10 |                                                                                                      |                        |
